# Supplementary material for: MYB64 and MYB119 Are Required for Cellularization and Differentiation during Female Gametogenesis in Arabidopsis thaliana
Source: PLoS Genet. 2013 Sep 19;9(9):e1003783. doi: 10.1371/journal.pgen.1003783 (PMC3778002; doi:10.1371/journal.pgen.1003783)
Supplement: Table S3 — List of primers used in this study. (XLSX) [file pgen.1003783.s012.xlsx]

## Sheet: Sheet1
Table S3. List of primers used in this study.
Purpose	Forward Primer Name	Forward Primer Sequence 5'-3'	Reverse Primer Name	Reverse Primer Sequence 5'-3'
Amplify promoter and coding region ProMYB64:MYB64-GFP	ENTRpMYB64F	CACCAGCCGTGTGTATTACAATGAG	ENTRMYB64R	GAACAATGGGAACCAAATGTTGCTA
Amplify promoter and coding region ProMYB119:MYB119-GFP	ENTRpMYB119F	CACCGATGGAACCCATAACGTGAG	ENTRMYB119R	GACCAACGGGAAGCAGATGT
Amplify MYB119 3’ sequence for ProMYB119:MYB119-GFP	MYB1193UTRSacF	TTACGCCGAGCTCGGTCTAGCTACATCCATGATC	MYB1193UTRSacR	TTACGCCGAGCTCAATACGTCGTAGACGATGACG
Amplify promoter ProMYB64:H2B-GFP	pMYB64KpnF	TTACGCCGGTACCAGCCGTGTGTATTACAATGAG	pMYB64BamR	TTACGCCGGATCCAGCGAGGCTCTTCTCTTGAA
Amplify promoter ProMYB119:H2B-GFP	pMYB119Sac2F	TTACGCCGAGCTCGATGGAACCCATAACGTGAG	pMYB119SalR	TTACGCCGTCGACGACAAGGCGTCGGTCTTCCAT
Amplify promoter and coding region ProCKI1:CKI1-GFP	ENTRpCKI1F2	CACCCAGACCAAAAGAAAGACAACGG	ENTRCKI1R	GTGACGTTTGCTTTCGATTTC
qRT-PCR ACTIN2	QACT2F	TCCCTCAGCACATTCCAGCAGAT	QACT2R	AACGATTCCTGGACCTGCCTCATC
qRT-PCR MYB64	AT5G11050Fb	GAAGAGCCTCGCTCACGGCG	AT5G11050Rb	TCGCCCTTGTCGTCTTCACG
qRT-PCR MYB119	AT5G58850Fa	GCCAAACTTCGGATGAGGTA	AT5G58850Ra	CTGTGATCGTTGCCTCTTGA
qRT-PCR MYB119 in cki1-8	AT5G58850Ff	GCGGCAACAGAAACCCTACT	AT5G58850Rf	CACCAACCTTATCAACTTCCTGTC
qRT-PCR CKI1	CKI1Fa	AGGTGCCCTTGCAGGGATGA	CKI1Ra	AGCAGAGCAACCAAATCCTTGGCG
qRT-PCR FIS2	FIS2Fa	CACTCCCAAACAATGCAGCC	FIS2Ra	ATCCGCGATCACCCTTTGTT
Genotype myb64-1 mutant allele. Amplify myb64-1 5’ border.	S_095057RP4	TGCCGCTTCGTCGGTTACACA	LBa1	TGGTTCACGTAGTGGGCCATCG
Genotype myb64-1 WT allele	MYB64promSEQ4	GTCTCACCTCCCCATTCTACAC	S_095057LP4	ATGCGCGGCCTTTTAGCGGA
Amplify myb64-1 3’ T-DNA border using inverse PCR	MYB64TAIL2	TCCTCGGACCAAACATCATG	AT5G11050Fc	ACAAGGGCGAACCGAAAACTCG
Genotype myb64-2 mutant allele	SAIL_539_G08LP	CCATTCGCTCGAGAACATCAA	LBa1	TGGTTCACGTAGTGGGCCATCG
Genotype myb64-3 mutant allele	SAIL_539_G08LP	CCATTCGCTCGAGAACATCAA	LB3	TAGCATCTGAATTTCATAACCAATCTCGATACAC
Genotype myb64-2 or myb64-3 WT allele	SAIL_539_G08LP	CCATTCGCTCGAGAACATCAA	SAIL_539_G08RP	CCCCCAGCTGGACTAATCATTT
Genotype myb64-4 mutant allele. Amplify myb64-4 3’ T-DNA border.	LB3	TAGCATCTGAATTTCATAACCAATCTCGATACAC	SAIL_876_E05RP	GGCAGGTTCTGTGACCATTGC
Genotype myb64-4 WT allele	MYB119SEQ2	CAGAAAGATGGATGGAGTGA	SAIL_876_E05RP	GGCAGGTTCTGTGACCATTGC
Amplify myb64-4 5’ T-DNA border using inverse PCR	ENTRpMYB64R	TTGAATTTTCTGTTCTTCCATGG	AT5G11050Fc	ACAAGGGCGAACCGAAAACTCG
Genotype myb119-1 mutant allele. Amplify myb119-1 3’ T-DNA border.	LBa1	TGGTTCACGTAGTGGGCCATCG	SALK_130196RP	TTTGAGTTTGTTCAACTCTTTTTGA
Genotype myb119-1 WT allele	MYB119SEQ2	CAGAAAGATGGATGGAGTGA	SALK_130196RP	TTTGAGTTTGTTCAACTCTTTTTGA
Amplify myb119-1 5’ T-DNA border	MYB119SEQ2	CAGAAAGATGGATGGAGTGA	LBa1	TGGTTCACGTAGTGGGCCATCG
Genotype myb119-2 mutant allele	MYB119-2LP	TGAGCCAAACTTCGGATGAGG	LBa1	TGGTTCACGTAGTGGGCCATCG
Genotype myb119-2 WT allele	MYB119-2LP	TGAGCCAAACTTCGGATGAGG	SALK_120179RP	CTTCAGCCGTTCTCCTCCGTT
Genotype myb119-3 mutant allele. Amplify myb119-3 3’ T-DNA border.	LBa1	TGGTTCACGTAGTGGGCCATCG	S_120501RP	TGCCTCACCAACCTTATCAAC
Genotype myb119-3 WT allele	S_120501LP	TACTTGGGATATTCCACGGTG	S_120501RP	TGCCTCACCAACCTTATCAAC
Amplify myb119-3 5’ T-DNA border	S_120501LP	TACTTGGGATATTCCACGGTG	LBa1	TGGTTCACGTAGTGGGCCATCG
Genotype myb119-4 mutant allele	SAIL_228_H05LP	TGAGCCAAACTTCGGATGAGG	LB3	TAGCATCTGAATTTCATAACCAATCTCGATACAC
Genotype myb119-4 WT allele	SAIL_228_H05LP	TGAGCCAAACTTCGGATGAGG	SAIL_228_H05RP	TGCTTGGGAAAGGACTTGGCT
Genotype myb119-5 mutant allele. Amplify myb119-5 3’ T-DNA border.	LB3	TAGCATCTGAATTTCATAACCAATCTCGATACAC	SAIL_204_B10RP	TGTGATTCCACAAGAACCCTC
Genotype myb119-5 WT allele	SAIL_204_B10LP	GCTCATTGTTAACTTCTGGGG	SAIL_204_B10RP	TGTGATTCCACAAGAACCCTC
Amplify myb119-5 5’ T-DNA border.	SAIL_204_B10LP	GCTCATTGTTAACTTCTGGGG	SAIL_QRB1	CAAACTAGGATAAATTATCGCGCGCGGTGTCA
Genotype cki1-9 mutant allele. Amplify cki1-9 3’ T-DNA border.	LBa1	TGGTTCACGTAGTGGGCCATCG	S_057881RP	TCCTTTGTTGGGAAACATGAG
Genotype cki1-9 WT allele	S_057881LP	TTTCGGAGATTGAAAACATCG	S_057881RP	TCCTTTGTTGGGAAACATGAG
Amplify cki1-9 5’ T-DNA border	S_057881LP	TTTCGGAGATTGAAAACATCG	pROK2RB3	CATTAAACTCCAGAAACCCG
